# Supplementary material
Source: PubMed Central journal article supplement (PMC4767970)
Supplement: JCM.02590-15_zjm999094800so1.pdf [file JCM.02590-15_zjm999094800so1.pdf]

**TABLE S1** Direct identification results by the MALDI BioTyper system and FilmArray BCID panel for 171 polymicrobial BSIs stratified by the causative species assortments

| Species (no. with positive resistance determinant result) identified by the reference method, for <i>n</i> BSI episodes studied <sup>a</sup> | Species detected by the indicated method, for <i>n</i> BSI episodes (no. with positive resistance determinant result) <sup>b</sup> | MALDI BioTyper system <sup>c</sup>                                                                                                |                                                                       | No. of BSIs with the FilmArray BCID panel result interpreted as:     |                 |                |
|----------------------------------------------------------------------------------------------------------------------------------------------|------------------------------------------------------------------------------------------------------------------------------------|-----------------------------------------------------------------------------------------------------------------------------------|-----------------------------------------------------------------------|----------------------------------------------------------------------|-----------------|----------------|
|                                                                                                                                              |                                                                                                                                    | FilmArray BCID panel <sup>c</sup>                                                                                                 |                                                                       |                                                                      | Complete ID     | Partial ID     |
|                                                                                                                                              |                                                                                                                                    |                                                                                                                                   | Top match score of $\geq 1.8$                                         | Other species in top 10 matches list with scores of $>1.7$ to $<1.8$ |                 |                |
| <b>Gram-negative bacteria only</b>                                                                                                           |                                                                                                                                    |                                                                                                                                   |                                                                       |                                                                      |                 |                |
| <i>A. baumannii</i> + <i>K. pneumoniae</i> (1 <i>bla</i> <sub>KPC</sub> ), <i>n</i> = 1                                                      | <i>A. baumannii</i> + <i>K. pneumoniae</i> , <i>n</i> = 1 (1 <i>bla</i> <sub>KPC</sub> )                                           | <i>K. pneumoniae</i> , <i>n</i> = 1                                                                                               | None                                                                  |                                                                      | 1               | 0              |
| <i>A. baumannii</i> + <i>P. mirabilis</i> , <i>n</i> = 1                                                                                     | <i>A. baumannii</i> + <i>Proteus</i> sp., <i>n</i> = 1                                                                             | <i>P. mirabilis</i> , <i>n</i> = 1                                                                                                | None                                                                  |                                                                      | 1               | 0              |
| <i>A. baumannii</i> + <i>P. stuartii</i> , <i>n</i> = 1                                                                                      | <i>A. baumannii</i> , <i>n</i> = 1 <sup>d</sup>                                                                                    | <i>A. baumannii</i> , <i>n</i> = 1                                                                                                | None                                                                  |                                                                      | 0               | 1              |
| <i>A. baumannii</i> + <i>S. marcescens</i> , <i>n</i> = 1                                                                                    | <i>A. baumannii</i> + <i>Serratia</i> sp., <i>n</i> = 1                                                                            | <i>A. baumannii</i> , <i>n</i> = 1                                                                                                | <i>S. marcescens</i> , <i>n</i> = 1                                   |                                                                      | 1               | 0              |
| <i>C. freundii</i> + <i>S. marcescens</i> , <i>n</i> = 1                                                                                     | <i>Serratia</i> sp., <i>n</i> = 1 (1 <i>mecA</i> ) <sup>e</sup>                                                                    | None                                                                                                                              | None                                                                  |                                                                      | 0               | 1              |
| <i>E. cloacae</i> + <i>S. marcescens</i> , <i>n</i> = 1                                                                                      | <i>E. cloacae</i> complex + <i>Serratia</i> sp., <i>n</i> = 1                                                                      | None                                                                                                                              | None                                                                  |                                                                      | 1               | 0              |
| <i>E. cloacae</i> + <i>E. coli</i> , <i>n</i> = 1                                                                                            | <i>E. cloacae</i> complex + <i>E. coli</i> , <i>n</i> = 1                                                                          | <i>E. cloacae</i> , <i>n</i> = 1                                                                                                  | <i>E. coli</i> , <i>n</i> = 1                                         |                                                                      | 1               | 0              |
| <i>E. cloacae</i> + <i>K. pneumoniae</i> , <i>n</i> = 1                                                                                      | <i>E. cloacae</i> complex + <i>K. pneumoniae</i> , <i>n</i> = 1                                                                    | <i>K. pneumoniae</i> , <i>n</i> = 1                                                                                               | <i>E. cloacae</i> , <i>n</i> = 1                                      |                                                                      | 1               | 0              |
| <i>E. coli</i> + <i>K. pneumoniae</i> (5 <i>bla</i> <sub>KPC</sub> ), <i>n</i> = 9                                                           | <i>E. coli</i> + <i>K. pneumoniae</i> , <i>n</i> = 9 (5 <i>bla</i> <sub>KPC</sub> ; 1 <i>mecA</i> ) <sup>e</sup>                   | <i>E. coli</i> , <i>n</i> = 6;<br><i>K. pneumoniae</i> , <i>n</i> = 2;<br><i>E. coli</i> + <i>K. pneumoniae</i> ,<br><i>n</i> = 1 | <i>K. pneumoniae</i> , <i>n</i> = 2;<br><i>E. coli</i> , <i>n</i> = 6 |                                                                      | 9               | 0              |
| <i>E. coli</i> + <i>M. morgani</i> , <i>n</i> = 1                                                                                            | <i>E. coli</i> , <i>n</i> = 1                                                                                                      | None                                                                                                                              | None                                                                  |                                                                      | 0               | 1              |
| <i>E. coli</i> + <i>P. mirabilis</i> , <i>n</i> = 1                                                                                          | <i>E. coli</i> + <i>Proteus</i> sp., <i>n</i> = 1                                                                                  | None                                                                                                                              | None                                                                  |                                                                      | 1               | 0              |
| <i>E. coli</i> + <i>S. marcescens</i> , <i>n</i> = 1                                                                                         | <i>E. coli</i> + <i>Serratia</i> sp., <i>n</i> = 1                                                                                 | <i>E. coli</i> , <i>n</i> = 1                                                                                                     | <i>S. marcescens</i> , <i>n</i> = 1                                   |                                                                      | 1               | 0              |
| <i>K. pneumoniae</i> + <i>M. morgani</i> , <i>n</i> = 1                                                                                      | <i>K. pneumoniae</i> , <i>n</i> = 1                                                                                                | <i>K. pneumoniae</i> , <i>n</i> = 1                                                                                               | <i>M. morgani</i> , <i>n</i> = 1                                      |                                                                      | 0               | 1              |
| <i>K. pneumoniae</i> + <i>P. mirabilis</i> , <i>n</i> = 2                                                                                    | <i>K. pneumoniae</i> + <i>Proteus</i> sp., <i>n</i> = 2                                                                            | <i>K. pneumoniae</i> , <i>n</i> = 2                                                                                               | <i>P. mirabilis</i> , <i>n</i> = 2                                    |                                                                      | 2               | 0              |
| <i>K. pneumoniae</i> (1 <i>bla</i> <sub>KPC</sub> ) + <i>P. aeruginosa</i> , <i>n</i> = 4                                                    | <i>K. pneumoniae</i> + <i>P. aeruginosa</i> , <i>n</i> = 4 (1 <i>bla</i> <sub>KPC</sub> )                                          | <i>K. pneumoniae</i> , <i>n</i> = 3                                                                                               | None                                                                  |                                                                      | 4               | 0              |
| <i>P. mirabilis</i> + <i>P. aeruginosa</i> , <i>n</i> = 5                                                                                    | <i>Proteus</i> sp. + <i>P. aeruginosa</i> , <i>n</i> = 5                                                                           | <i>P. mirabilis</i> , <i>n</i> = 2;<br><i>P. aeruginosa</i> , <i>n</i> = 2                                                        | None;<br><i>P. mirabilis</i> , <i>n</i> = 1                           |                                                                      | 5               | 0              |
| <i>P. aeruginosa</i> + <i>S. maltophilia</i> , <i>n</i> = 1                                                                                  | <i>P. aeruginosa</i> , <i>n</i> = 1                                                                                                | <i>P. aeruginosa</i> , <i>n</i> = 1                                                                                               | <i>S. maltophilia</i>                                                 |                                                                      | 0               | 1              |
| <i>E. coli</i> + <i>K. pneumoniae</i> (1 <i>bla</i> <sub>KPC</sub> ) + <i>P. mirabilis</i> , <i>n</i> = 1                                    | <i>E. coli</i> + <i>K. pneumoniae</i> + <i>Proteus</i> sp., <i>n</i> = 1 (1 <i>bla</i> <sub>KPC</sub> )                            | None                                                                                                                              |                                                                       |                                                                      | 1               | 0              |
| Total species = 69, <i>n</i> = 34                                                                                                            | Total species = 64, <i>n</i> = 34                                                                                                  | Total species = 28, <i>n</i> = 27                                                                                                 | Not calculated                                                        | Total BSIs = 29                                                      | Total BSIs = 29 | Total BSIs = 5 |
| <b>Gram-positive bacteria only</b>                                                                                                           |                                                                                                                                    |                                                                                                                                   |                                                                       |                                                                      |                 |                |
| <i>E. faecalis</i> + <i>B. cereus</i> , <i>n</i> = 1                                                                                         | Enterococcus, <i>n</i> = 1                                                                                                         | <i>E. faecalis</i> , <i>n</i> = 1                                                                                                 | None                                                                  |                                                                      | 0               | 1              |
| <i>E. faecalis</i> + <i>E. gallinarum</i> , <i>n</i> = 1                                                                                     | Enterococcus, <i>n</i> = 1                                                                                                         | None                                                                                                                              | <i>E. faecalis</i> , <i>n</i> = 1                                     |                                                                      | 1               | 0              |
| <i>E. faecalis</i> + <i>St. aureus</i> (1 <i>mecA</i> ), <i>n</i> = 1                                                                        | Enterococcus + <i>St. aureus</i> , <i>n</i> = 1 (1 <i>mecA</i> )                                                                   | <i>St. aureus</i> , <i>n</i> = 1                                                                                                  | <i>E. faecalis</i> , <i>n</i> = 1                                     |                                                                      | 1               | 0              |
| <i>E. faecalis</i> + <i>St. epidermidis</i> (6 <i>mecA</i> ), <i>n</i> = 7                                                                   | Enterococcus + CoNS, <i>n</i> = 7 (7 <i>mecA</i> ) <sup>e</sup>                                                                    | <i>St. epidermidis</i> , <i>n</i> = 2                                                                                             | <i>E. faecalis</i> , <i>n</i> = 1                                     |                                                                      | 7               | 0              |

|                                                                                             |                                                                                            |                                       |                                   |                 |                |
|---------------------------------------------------------------------------------------------|--------------------------------------------------------------------------------------------|---------------------------------------|-----------------------------------|-----------------|----------------|
| <i>E. faecalis</i> + <i>St. haemolyticus</i> (2 <i>mecA</i> ), <i>n</i> = 2                 | Enterococcus + CoNS, <i>n</i> = 1 (1 <i>mecA</i> );<br>CoNS, <i>n</i> = 1 (1 <i>mecA</i> ) | None                                  | <i>E. faecalis</i> , <i>n</i> = 1 | 1               | 1              |
| <i>E. faecium</i> + <i>St. capitis</i> , <i>n</i> = 1                                       | Enterococcus, <i>n</i> = 1                                                                 | None                                  | None                              | 0               | 1              |
| <i>E. faecium</i> (1 <i>vanA</i> ) + <i>St. epidermidis</i> (1 <i>mecA</i> ), <i>n</i> = 1  | Enterococcus + CoNS, <i>n</i> = 1 (1 <i>vanA/B</i> ; 1 <i>mecA</i> )                       | <i>E. faecium</i> , <i>n</i> = 1      | None                              | 1               | 0              |
| <i>E. gallinarum</i> + <i>St. epidermidis</i> , <i>n</i> = 1                                | Enterococcus + CoNS, <i>n</i> = 1                                                          | <i>E. gallinarum</i> , <i>n</i> = 1   | None                              | 1               | 0              |
| <i>St. aureus</i> (3 <i>mecA</i> ) + <i>St. epidermidis</i> (3 <i>mecA</i> ), <i>n</i> = 5  | <i>St. aureus</i> + CoNS, <i>n</i> = 5 (3 <i>mecA</i> )                                    | None                                  | <i>St. aureus</i> , <i>n</i> = 3  | 5               | 0              |
| <i>St. aureus</i> (1 <i>mecA</i> ) + <i>St. haemolyticus</i> (2 <i>mecA</i> ), <i>n</i> = 2 | <i>St. aureus</i> + CoNS, <i>n</i> = 2 (2 <i>mecA</i> )                                    | None                                  | <i>St. aureus</i> , <i>n</i> = 1  | 2               | 0              |
| <i>St. aureus</i> + <i>St. hominis</i> (1 <i>mecA</i> ), <i>n</i> = 2                       | <i>St. aureus</i> + CoNS, <i>n</i> = 2 (1 <i>mecA</i> )                                    | None                                  | <i>St. aureus</i> , <i>n</i> = 1  | 2               | 0              |
| <i>St. aureus</i> + <i>Str. pneumoniae</i> , <i>n</i> = 1                                   | <i>St. aureus</i> + <i>Str. pneumoniae</i> , <i>n</i> = 1                                  | None                                  | <i>St. aureus</i> , <i>n</i> = 1  | 1               | 0              |
| <i>Str. agalactiae</i> + <i>St. epidermidis</i> , <i>n</i> = 1                              | <i>Str. agalactiae</i> + CoNS, <i>n</i> = 1                                                | <i>Str. agalactiae</i> , <i>n</i> = 1 | None                              | 1               | 0              |
| <i>Str. mitis</i> + <i>St. epidermidis</i> (1 <i>mecA</i> ), <i>n</i> = 1                   | Streptococcus + CoNS, <i>n</i> = 1 (1 <i>mecA</i> )                                        | <i>Str. mitis</i> , <i>n</i> = 1      | None                              | 1               | 0              |
| <i>Str. pneumoniae</i> + <i>St. epidermidis</i> , <i>n</i> = 1                              | <i>Str. pneumoniae</i> + CoNS, <i>n</i> = 1                                                | <i>Str. pneumoniae</i> , <i>n</i> = 1 | None                              | 1               | 0              |
| Total species = 56, <i>n</i> = 28                                                           | Total species = 53, <i>n</i> = 28                                                          | Total species = 9, <i>n</i> = 9       | Not calculated                    | Total BSIs = 25 | Total BSIs = 3 |

Gram-negative/Gram-positive bacteria

|                                                                                                              |                                                                                                 |                                                                                                         |                                    |   |   |
|--------------------------------------------------------------------------------------------------------------|-------------------------------------------------------------------------------------------------|---------------------------------------------------------------------------------------------------------|------------------------------------|---|---|
| <i>A. baumannii</i> + <i>E. faecalis</i> , <i>n</i> = 1                                                      | <i>A. baumannii</i> + Enterococcus, <i>n</i> = 1                                                | <i>A. baumannii</i> , <i>n</i> = 1                                                                      | None                               | 1 | 0 |
| <i>A. baumannii</i> + <i>St. aureus</i> (1 <i>mecA</i> ), <i>n</i> = 1                                       | <i>A. baumannii</i> + <i>St. aureus</i> , <i>n</i> = 1 (1 <i>mecA</i> )                         | <i>St. aureus</i> , <i>n</i> = 1                                                                        | <i>A. baumannii</i> , <i>n</i> = 1 | 1 | 0 |
| <i>A. baumannii</i> + <i>St. epidermidis</i> (1 <i>mecA</i> ), <i>n</i> = 2                                  | <i>A. baumannii</i> + CoNS, <i>n</i> = 2 (1 <i>mecA</i> )                                       | <i>A. baumannii</i> , <i>n</i> = 2                                                                      | None                               | 2 | 0 |
| <i>A. baumannii</i> + <i>St. haemolyticus</i> (1 <i>mecA</i> ), <i>n</i> = 1                                 | <i>A. baumannii</i> + CoNS, <i>n</i> = 1 (1 <i>mecA</i> )                                       | <i>A. baumannii</i> , <i>n</i> = 1                                                                      | None                               | 1 | 0 |
| <i>Camp. rectus</i> + <i>Parvimonas micra</i> , <i>n</i> = 1                                                 | None                                                                                            | None                                                                                                    | None                               | 0 | 0 |
| <i>C. freundii</i> + <i>E. faecium</i> , <i>n</i> = 1                                                        | Enteric + Enterococcus, <i>n</i> = 1                                                            | None                                                                                                    | None                               | 1 | 0 |
| <i>C. koseri</i> + <i>St. hominis</i> (1 <i>mecA</i> ), <i>n</i> = 1                                         | Enteric, <i>n</i> = 1 (1 <i>mecA</i> ) <sup>f</sup>                                             | None                                                                                                    | <i>C. koseri</i> , <i>n</i> = 1    | 0 | 1 |
| <i>E. aerogenes</i> + <i>E. faecalis</i> , <i>n</i> = 1                                                      | Enteric + Enterococcus, <i>n</i> = 1                                                            | <i>E. aerogenes</i> , <i>n</i> = 1                                                                      | None                               | 1 | 0 |
| <i>E. cloacae</i> + <i>E. faecalis</i> , <i>n</i> = 1                                                        | <i>E. cloacae</i> complex + Enterococcus, <i>n</i> = 1                                          | <i>E. cloacae</i> , <i>n</i> = 1                                                                        | <i>E. faecalis</i> , <i>n</i> = 1  | 1 | 0 |
| <i>E. coli</i> + <i>B. cereus</i> , <i>n</i> = 1                                                             | <i>E. coli</i> , <i>n</i> = 1                                                                   | <i>E. coli</i> , <i>n</i> = 1                                                                           | None                               | 0 | 1 |
| <i>E. coli</i> + <i>Cl. perfringens</i> , <i>n</i> = 2                                                       | <i>E. coli</i> , <i>n</i> = 2                                                                   | <i>E. coli</i> , <i>n</i> = 2                                                                           | None                               | 0 | 2 |
| <i>E. coli</i> + <i>Cl. tertium</i> , <i>n</i> = 1                                                           | <i>E. coli</i> , <i>n</i> = 1 <sup>d</sup>                                                      | <i>E. coli</i> , <i>n</i> = 1                                                                           | None                               | 0 | 1 |
| <i>E. coli</i> + <i>E. faecalis</i> , <i>n</i> = 6                                                           | <i>E. coli</i> + Enterococcus, <i>n</i> = 6                                                     | <i>E. coli</i> , <i>n</i> = 3                                                                           | <i>E. faecalis</i> , <i>n</i> = 1  | 6 | 0 |
| <i>E. coli</i> + <i>E. faecium</i> , <i>n</i> = 4                                                            | <i>E. coli</i> + Enterococcus, <i>n</i> = 4                                                     | <i>E. coli</i> , <i>n</i> = 3                                                                           | None                               | 4 | 0 |
| <i>E. coli</i> + <i>St. epidermidis</i> (2 <i>mecA</i> ), <i>n</i> = 2                                       | <i>E. coli</i> + CoNS, <i>n</i> = 2 (2 <i>mecA</i> )                                            | <i>E. coli</i> , <i>n</i> = 1;<br><i>E. coli</i> + <i>St. epidermidis</i> ,<br><i>n</i> = 1             | None                               | 2 | 0 |
| <i>E. coli</i> + <i>Str. anginosus</i> , <i>n</i> = 1                                                        | <i>E. coli</i> + Streptococcus, <i>n</i> = 1                                                    | <i>E. coli</i> , <i>n</i> = 1                                                                           | None                               | 1 | 0 |
| <i>K. oxytoca</i> + <i>Str. mitis</i> , <i>n</i> = 1                                                         | <i>K. oxytoca</i> + Streptococcus, <i>n</i> = 1                                                 | None                                                                                                    | <i>K. oxytoca</i> , <i>n</i> = 1   | 1 | 0 |
| <i>K. pneumoniae</i> (1 <i>bla</i> <sub>KPC</sub> ) + <i>E. faecalis</i> , <i>n</i> = 4                      | <i>K. pneumoniae</i> + Enterococcus, <i>n</i> = 4 (1 <i>bla</i> <sub>KPC</sub> )                | <i>K. pneumoniae</i> , <i>n</i> = 4                                                                     | <i>E. faecalis</i> , <i>n</i> = 1  | 4 | 0 |
| <i>K. pneumoniae</i> (1 <i>bla</i> <sub>KPC</sub> ) + <i>E. gallinarum</i> , <i>n</i> = 1                    | <i>K. pneumoniae</i> + Enterococcus, <i>n</i> = 1 (1 <i>bla</i> <sub>KPC</sub> )                | <i>K. pneumoniae</i> , <i>n</i> = 1                                                                     | None                               | 1 | 0 |
| <i>K. pneumoniae</i> (1 <i>bla</i> <sub>KPC</sub> ) + <i>St. capitis</i> (1 <i>mecA</i> ), <i>n</i> = 1      | <i>K. pneumoniae</i> , <i>n</i> = 1 (1 <i>bla</i> <sub>KPC</sub> ; 1 <i>mecA</i> ) <sup>g</sup> | <i>K. pneumoniae</i> , <i>n</i> = 1                                                                     | None                               | 0 | 1 |
| <i>K. pneumoniae</i> + <i>St. epidermidis</i> (3 <i>mecA</i> ), <i>n</i> = 3                                 | <i>K. pneumoniae</i> + CoNS, <i>n</i> = 3 (3 <i>mecA</i> )                                      | <i>K. pneumoniae</i> , <i>n</i> = 2;<br><i>K. pneumoniae</i> + <i>St. epidermidis</i> ,<br><i>n</i> = 1 | None                               | 3 | 0 |
| <i>K. pneumoniae</i> (1 <i>bla</i> <sub>KPC</sub> ) + <i>St. haemolyticus</i> (1 <i>mecA</i> ), <i>n</i> = 1 | <i>K. pneumoniae</i> + CoNS, <i>n</i> = 1 (1 <i>bla</i> <sub>KPC</sub> ; 1 <i>mecA</i> )        | <i>K. pneumoniae</i> , <i>n</i> = 1                                                                     | None                               | 1 | 0 |
| <i>K. pneumoniae</i> (2 <i>bla</i> <sub>KPC</sub> ) + <i>St. hominis</i> (2 <i>mecA</i> ), <i>n</i> = 2      | <i>K. pneumoniae</i> + CoNS, <i>n</i> = 2 (2 <i>bla</i> <sub>KPC</sub> ; 2 <i>mecA</i> )        | <i>K. pneumoniae</i> , <i>n</i> = 2                                                                     | None                               | 2 | 0 |
| <i>M. morgani</i> + <i>St. haemolyticus</i> (1 <i>mecA</i> ), <i>n</i> = 1                                   | CoNS, <i>n</i> = 1 (1 <i>mecA</i> )                                                             | None                                                                                                    | None                               | 0 | 1 |
| <i>P. mirabilis</i> + <i>E. faecalis</i> , <i>n</i> = 2                                                      | <i>Proteus</i> sp. + Enterococcus, <i>n</i> = 2                                                 | None                                                                                                    | None                               | 2 | 0 |
| <i>P. mirabilis</i> + <i>St. epidermidis</i> (2 <i>mecA</i> ), <i>n</i> = 2                                  | <i>Proteus</i> sp. + CoNS, <i>n</i> = 2 (2 <i>mecA</i> )                                        | <i>P. mirabilis</i> , <i>n</i> = 2                                                                      | None                               | 2 | 0 |

|                                                                                                                                                    |                                                                                                                                           |                                                   |                                      |                 |                |
|----------------------------------------------------------------------------------------------------------------------------------------------------|-------------------------------------------------------------------------------------------------------------------------------------------|---------------------------------------------------|--------------------------------------|-----------------|----------------|
| <i>P. mirabilis</i> + <i>St. haemolyticus</i> (2 <i>mecA</i> ), <i>n</i> = 2                                                                       | <i>Proteus</i> sp. + CoNS, <i>n</i> = 2 (2 <i>mecA</i> )                                                                                  | <i>P. mirabilis</i> , <i>n</i> = 2                | None                                 | 2               | 0              |
| <i>P. aeruginosa</i> + <i>E. faecalis</i> , <i>n</i> = 3                                                                                           | <i>P. aeruginosa</i> + Enterococcus, <i>n</i> = 3                                                                                         | <i>P. aeruginosa</i> , <i>n</i> = 2               | <i>E. faecalis</i> , <i>n</i> = 1    | 3               | 0              |
| <i>P. aeruginosa</i> + <i>E. faecium</i> (1 <i>vanA</i> ), <i>n</i> = 2                                                                            | <i>P. aeruginosa</i> + Enterococcus, <i>n</i> = 2 (1 <i>vanA/B</i> )                                                                      | None                                              | <i>P. aeruginosa</i> , <i>n</i> = 1  | 2               | 0              |
| <i>P. aeruginosa</i> + <i>Listeria monocytogenes</i> , <i>n</i> = 1                                                                                | <i>P. aeruginosa</i> + <i>Listeria monocytogenes</i> , <i>n</i> = 1                                                                       | None                                              | None                                 | 1               | 0              |
| <i>P. aeruginosa</i> + <i>St. aureus</i> (1 <i>mecA</i> ), <i>n</i> = 1                                                                            | <i>P. aeruginosa</i> + <i>St. aureus</i> , <i>n</i> = 1 (1 <i>mecA</i> )                                                                  | <i>St. aureus</i> , <i>n</i> = 1                  | None                                 | 1               | 0              |
| <i>P. aeruginosa</i> + <i>St. capitis</i> (1 <i>mecA</i> ), <i>n</i> = 1                                                                           | <i>P. aeruginosa</i> + CoNS, <i>n</i> = 1 (1 <i>mecA</i> )                                                                                | None                                              | None                                 | 1               | 0              |
| <i>P. aeruginosa</i> + <i>St. epidermidis</i> (4 <i>mecA</i> ), <i>n</i> = 5                                                                       | <i>P. aeruginosa</i> + CoNS, <i>n</i> = 5 (5 <i>mecA</i> ) <sup>e</sup>                                                                   | <i>P. aeruginosa</i> , <i>n</i> = 5               | None                                 | 5               | 0              |
| <i>P. aeruginosa</i> + <i>St. haemolyticus</i> (3 <i>mecA</i> ), <i>n</i> = 3                                                                      | <i>P. aeruginosa</i> + CoNS, <i>n</i> = 3 (3 <i>mecA</i> )                                                                                | <i>P. aeruginosa</i> , <i>n</i> = 1               | None                                 | 3               | 0              |
| <i>P. aeruginosa</i> + <i>St. hominis</i> (1 <i>mecA</i> ), <i>n</i> = 2                                                                           | <i>P. aeruginosa</i> + CoNS, <i>n</i> = 2 (1 <i>mecA</i> )                                                                                | <i>P. aeruginosa</i> , <i>n</i> = 2               | None                                 | 2               | 0              |
| <i>P. aeruginosa</i> + <i>Str. mitis</i> , <i>n</i> = 1                                                                                            | <i>P. aeruginosa</i> + Streptococcus, <i>n</i> = 1                                                                                        | None                                              | None                                 | 1               | 0              |
| <i>P. aeruginosa</i> + <i>Str. sanguinis</i> , <i>n</i> = 1                                                                                        | <i>P. aeruginosa</i> + Streptococcus, <i>n</i> = 1                                                                                        | None                                              | <i>P. aeruginosa</i> , <i>n</i> = 1  | 1               | 0              |
| <i>S. marcescens</i> + <i>St. hominis</i> (1 <i>mecA</i> ), <i>n</i> = 1                                                                           | <i>Serratia</i> sp.+ CoNS, <i>n</i> = 1 (1 <i>mecA</i> )                                                                                  | <i>S. marcescens</i> , <i>n</i> = 1               | None                                 | 1               | 0              |
| <i>S. maltophilia</i> + <i>St. haemolyticus</i> (1 <i>mecA</i> ), <i>n</i> = 1                                                                     | CoNS, <i>n</i> = 1 (1 <i>mecA</i> )                                                                                                       | None                                              | <i>S. maltophilia</i> , <i>n</i> = 1 | 0               | 1              |
| <i>A. baumannii</i> + <i>E. faecalis</i> + <i>St. epidermidis</i> (1 <i>mecA</i> ), <i>n</i> = 1                                                   | <i>A. baumannii</i> + Enterococcus + CoNS, <i>n</i> = 1 (1 <i>mecA</i> )                                                                  | None                                              | <i>A. baumannii</i> , <i>n</i> = 1   | 1               | 0              |
| <i>E. coli</i> + <i>E. faecalis</i> + <i>E. faecium</i> , <i>n</i> = 1                                                                             | <i>E. coli</i> + Enterococcus, <i>n</i> = 1                                                                                               | <i>E. coli</i> + <i>E. faecium</i> , <i>n</i> = 1 | None                                 | 1               | 0              |
| <i>E. coli</i> + <i>E. faecalis</i> + <i>St. aureus</i> (1 <i>mecA</i> ), <i>n</i> = 1                                                             | <i>E. coli</i> + Enterococcus + <i>St. aureus</i> , <i>n</i> = 1 (1 <i>mecA</i> )                                                         | None                                              | <i>E. coli</i> , <i>n</i> = 1        | 1               | 0              |
| <i>E. coli</i> + <i>K. pneumoniae</i> + <i>E. faecalis</i> , <i>n</i> = 1                                                                          | <i>E. coli</i> + <i>K. pneumoniae</i> + Enterococcus, <i>n</i> = 1                                                                        | <i>K. pneumoniae</i> , <i>n</i> = 1               | <i>E. coli</i> , <i>n</i> = 1        | 1               | 0              |
| <i>E. coli</i> + <i>E. cloacae</i> + <i>E. faecalis</i> , <i>n</i> = 1                                                                             | <i>E. coli</i> + <i>E. cloacae</i> complex+ Enterococcus, <i>n</i> = 1                                                                    | <i>E. coli</i> , <i>n</i> = 1                     | None                                 | 1               | 0              |
| <i>K. pneumoniae</i> (1 <i>bla</i> <sub>KPC</sub> ) + <i>E. faecalis</i> + <i>St. hominis</i> (1 <i>mecA</i> ), <i>n</i> = 1                       | <i>K. pneumoniae</i> (1 <i>bla</i> <sub>KPC</sub> ) + Enterococcus + CoNS, <i>n</i> = 1 (1 <i>mecA</i> )                                  | <i>K. pneumoniae</i> , <i>n</i> = 1               | None                                 | 1               | 0              |
| <i>P. mirabilis</i> + <i>E. faecalis</i> + <i>St. aureus</i> (1 <i>mecA</i> ), <i>n</i> = 1                                                        | <i>Proteus</i> sp. + Enterococcus + <i>St. aureus</i> , <i>n</i> = 1 (1 <i>mecA</i> )                                                     | <i>P. mirabilis</i> , <i>n</i> = 1                | None                                 | 1               | 0              |
| <i>P. mirabilis</i> + <i>P. aeruginosa</i> + <i>E. faecalis</i> , <i>n</i> = 2                                                                     | <i>Proteus</i> sp. + <i>P. aeruginosa</i> + Enterococcus, <i>n</i> = 2                                                                    | <i>E. faecalis</i> , <i>n</i> = 1                 | <i>P. mirabilis</i> , <i>n</i> = 1   | 2               | 0              |
| <i>E. cloacae</i> + <i>E. coli</i> + <i>K. oxytoca</i> + <i>Str. gallolyticus</i> , <i>n</i> = 1                                                   | <i>E. cloacae</i> complex + <i>E. coli</i> + <i>K. oxytoca</i> + Streptococcus, <i>n</i> = 1                                              | None                                              | <i>E. coli</i> , <i>n</i> = 1        | 1               | 0              |
| <i>K. pneumoniae</i> (1 <i>bla</i> <sub>KPC</sub> ) + <i>P. mirabilis</i> + <i>St. aureus</i> (1 <i>mecA</i> ) + <i>E. faecalis</i> , <i>n</i> = 1 | <i>K. pneumoniae</i> + <i>Proteus</i> sp. + <i>St. aureus</i> + Enterococcus, <i>n</i> = 1 (1 <i>bla</i> <sub>KPC</sub> ; 1 <i>mecA</i> ) | <i>K. pneumoniae</i> , <i>n</i> = 1               | None                                 | 1               | 0              |
| Total species = 173, <i>n</i> = 80                                                                                                                 | Total species = 163, <i>n</i> = 79                                                                                                        | Total species = 58, <i>n</i> = 55                 | Not calculated                       | Total BSIs = 71 | Total BSIs = 8 |

---

Bacteria (Gram-negative or Gram-positive)/Yeasts

|                                                                                              |                                                                                              |                                       |                                    |   |   |
|----------------------------------------------------------------------------------------------|----------------------------------------------------------------------------------------------|---------------------------------------|------------------------------------|---|---|
| <i>A. baumannii</i> + <i>Candida albicans</i> , <i>n</i> = 1                                 | <i>A. baumannii</i> + <i>Candida albicans</i> , <i>n</i> = 1                                 | None                                  | <i>A. baumannii</i> , <i>n</i> = 1 | 1 | 0 |
| <i>E. coli</i> + <i>Candida albicans</i> , <i>n</i> = 2                                      | <i>E. coli</i> + <i>Candida albicans</i> , <i>n</i> = 2                                      | <i>E. coli</i> , <i>n</i> = 1         | <i>E. coli</i> , <i>n</i> = 1      | 2 | 0 |
| <i>K. pneumoniae</i> (1 <i>bla</i> <sub>KPC</sub> ) + <i>Candida albicans</i> , <i>n</i> = 1 | <i>K. pneumoniae</i> + <i>Candida albicans</i> , <i>n</i> = 1 (1 <i>bla</i> <sub>KPC</sub> ) | <i>K. pneumoniae</i> , <i>n</i> = 1   | None                               | 1 | 0 |
| <i>P. aeruginosa</i> + <i>Candida glabrata</i> , <i>n</i> = 1                                | <i>P. aeruginosa</i> + <i>Candida glabrata</i> , <i>n</i> = 1                                | <i>P. aeruginosa</i> , <i>n</i> = 1   | None                               | 1 | 0 |
| <i>E. faecalis</i> + <i>Candida albicans</i> , <i>n</i> = 1                                  | Enterococcus + <i>Candida albicans</i> , <i>n</i> = 1                                        | <i>E. faecalis</i> , <i>n</i> = 1     | None                               | 1 | 0 |
| <i>St. epidermidis</i> (4 <i>mecA</i> ) + <i>Candida albicans</i> , <i>n</i> = 7             | CoNS + <i>Candida albicans</i> , <i>n</i> = 7 (4 <i>mecA</i> )                               | <i>St. epidermidis</i> , <i>n</i> = 2 | None                               | 7 | 0 |
| <i>St. epidermidis</i> (5 <i>mecA</i> ) + <i>Candida parapsilosis</i> , <i>n</i> = 6         | CoNS + <i>Candida parapsilosis</i> , <i>n</i> = 6 (5 <i>mecA</i> )                           | <i>St. epidermidis</i> , <i>n</i> = 1 | None                               | 6 | 0 |
| <i>St. epidermidis</i> + <i>Candida tropicalis</i> , <i>n</i> = 2                            | CoNS + <i>Candida tropicalis</i> , <i>n</i> = 2                                              | <i>St. epidermidis</i> , <i>n</i> = 1 | None                               | 2 | 0 |
| <i>St. haemolyticus</i> (2 <i>mecA</i> ) + <i>Candida albicans</i> , <i>n</i> = 2            | CoNS + <i>Candida albicans</i> , <i>n</i> = 2 (2 <i>mecA</i> )                               | None                                  | None                               | 2 | 0 |
| <i>St. haemolyticus</i> (1 <i>mecA</i> ) + <i>Candida glabrata</i> , <i>n</i> = 1            | CoNS + <i>Candida glabrata</i> , <i>n</i> = 1 (1 <i>mecA</i> )                               | None                                  | None                               | 1 | 0 |

|                                                                                                                        |                                                                                                                  |                                       |                                      |                    |                   |
|------------------------------------------------------------------------------------------------------------------------|------------------------------------------------------------------------------------------------------------------|---------------------------------------|--------------------------------------|--------------------|-------------------|
| <i>K. pneumoniae</i> (1 <i>bla</i> <sub>KPC</sub> ) + <i>E. faecalis</i> + <i>Candida albicans</i> , <i>n</i> = 1      | <i>K. pneumoniae</i> + Enterococcus + <i>Candida albicans</i> , <i>n</i> = 1 (1 <i>bla</i> <sub>KPC</sub> )      | <i>K. pneumoniae</i> , <i>n</i> = 1   | None                                 | 1                  | 0                 |
| <i>S. maltophilia</i> + <i>St. hominis</i> (1 <i>mecA</i> ) + <i>Candida albicans</i> , <i>n</i> = 1                   | CoNS + <i>Candida albicans</i> , <i>n</i> = 1 (1 <i>mecA</i> )                                                   | None                                  | <i>S. maltophilia</i> , <i>n</i> = 1 | 0                  | 1                 |
| <i>E. faecium</i> + <i>St. haemolyticus</i> (1 <i>mecA</i> ) + <i>Candida albicans</i> , <i>n</i> = 1                  | Enterococcus + CoNS + <i>Candida albicans</i> , <i>n</i> = 1 (1 <i>mecA</i> )                                    | None                                  | None                                 | 1                  | 0                 |
| <i>St. haemolyticus</i> (1 <i>mecA</i> ) + <i>Candida albicans</i> + <i>Candida krusei</i> , <i>n</i> = 1              | CoNS + <i>Candida albicans</i> + <i>Candida krusei</i> , <i>n</i> = 1 (1 <i>mecA</i> )                           | None                                  | None                                 | 1                  | 0                 |
| <i>A. baumannii</i> + <i>E. faecalis</i> + <i>St. aureus</i> (1 <i>mecA</i> ) + <i>Candida albicans</i> , <i>n</i> = 1 | <i>A. baumannii</i> + Enterococcus + <i>St. aureus</i> + <i>Candida albicans</i> , <i>n</i> = 1 (1 <i>mecA</i> ) | <i>St. aureus</i> , <i>n</i> = 1      | None                                 | 1                  | 0                 |
| Total species = 64, <i>n</i> = 29                                                                                      | Total species = 63, <i>n</i> = 29                                                                                | Total species = 10, <i>n</i> = 10     | Not calculated                       | Total BSIs = 28    | Total BSIs = 1    |
| Overall species = 362, <i>n</i> = 171                                                                                  | Overall species = 343, <i>n</i> = 170                                                                            | Overall species = 105, <i>n</i> = 101 | Not calculated                       | Overall BSIs = 153 | Overall BSIs = 17 |

The MALDI BioTyper is one of the systems commercially available for matrix-assisted laser desorption ionization time of flight mass spectrometry (MALDI-TOF MS) analysis; BCID, blood culture identification; BSI, bloodstream infection; ID, identification; CoNS, coagulase-negative staphylococcus.

<sup>a</sup>Isolates were identified using a reference method which consisted of Gram-stain microscopic examination and subcultures on routine media, followed by MALDI-TOF MS analysis of bacterial or yeast colonies. Additionally, ID conventional phenotypical tests and/or sequencing analyses of the 16S rRNA and *rpoB* genes (for bacterial isolates) and the ITS1-5.8S-ITS2 rRNA gene regions (for yeast isolates) were performed whenever necessary.

<sup>b</sup>For some of the listed species, the FilmArray BCID panel provided results to the levels of genus or group of microorganisms. According to the manufacturer's product insert, isolates identified as Enterococcus were potentially belonging to *Enterococcus* species, such as *E. casseliflavus*, *E. durans*, *E. faecalis*, *E. faecium*, and *E. gallinarum*; isolates identified as CoNS were potentially belonging to *Staphylococcus* species, such as *S. capitis*, *S. caprae*, *S. cohnii*, *S. epidermidis*, *S. haemolyticus*, *S. hominis*, *S. kloosii*, *S. lugdunensis*, *S. microti*, *S. nepalensis*, *S. saccharolyticus*, *S. saprophyticus*, *S. simiae*, *S. warneri*, and *S. xylosus*; isolates identified as Enteric were potentially belonging to enteric species, such as *Cedeceae davisiae*, *Citrobacter* spp., *Cronobacter sakazakii*, *Enterobacter* spp., *Kluyvera ascorbata*, *Leclercia adecarboxylata*, *Raoultella* spp., *Salmonella* spp., *Shigella* spp., and *Yokenella regensburgei*; isolates identified as Streptococcus were potentially belonging to *Streptococcus* species, such as *S. anginosus*, *S. equinus*, *S. galloyticus*, *S. gordonii*, *S. mitis*, *S. mutans*, *S. oralis*, *S. parasanguinis*, *S. salivarius*, *S. sanguinis*, and *S. uberis*.

<sup>c</sup>BC testing by FilmArray BCID panel was performed according to the diagnostic algorithm presented in this study, whereas BC testing by MALDI BioTyper system was performed only for comparison purpose, unless in those BCs that were initially classified as monomicrobial infections based on the Gram stain results. Only MALDI BioTyper system results that yielded score values of  $\geq 1.8$  were considered as valid IDs to the species level.

<sup>d</sup>Additionally, a CoNS organism was identified by the FilmArray BCID panel method.

<sup>e</sup>The *mecA* resistance determinant was falsely detected in 1 episode.

<sup>f</sup>The *mecA* resistance determinant was correctly detected, despite the absence of detection for the corresponding CoNS organism (*St. hominis*).

<sup>g</sup>The *mecA* resistance determinant was correctly detected, despite the absence of detection for the corresponding CoNS organism (*St. capitis*).
